# Supplementary material for: Homologies between SARS-CoV-2 and allergen proteins may direct T cell-mediated heterologous immune responses
Source: Res Sq. 2020 Oct 6:rs.3.rs-86873. Preprint. [Version 1] doi: 10.21203/rs.3.rs-86873/v1 (PMC7553154; doi:10.21203/rs.3.rs-86873/v1)
Supplement: Supplement [file 81c6c0745f96dc66c31bd649.xlsx]

## Sheet: Top30 MHCI
Supplementary Table S4. The Top 30 candidate human HLA class I potentially cross-reactive T cell epitope pairs between SARS-CoV-2 and aeroallergens based on pair combined score (pipeline 1). N/a= not available
HLA Allele	Viral protein epitope	How often does it appear in Uniprot?	IEDB known epitope?	Conserved? (among other Corona strains)	Viral protein	Allergen epitope	How often does it appear in Uniprot?	IEDB known epitope?	Conserved? (among other allergens in our file)	Allergen name	Allergen species	Common name	Protein family (AllFam)	Major/Minor (>50% test positive, Allergen.org)	in ISAC®112 assay?	in ALEX® assay?	Pair combined score
HLA-A_11_01	AVKTQFNYYK	1	no	no	Uridylate-specific endoribonuclease (NendoU)	SVQDIYNYYK	19	no	1	Pen ch 35	Penicillium chrysogenum	Mold	Transaldolase	n/a	n/a	n/a	10816.1
HLA-A_11_01	TSNSFDVLK	3	no	no	Papain-like proteinase	GSNTFTILK	3	no	1	Mus m 1	Mus musculus	Mouse	Lipocalin	major	yes	yes	8188.49
HLA-A_01_01	KSDGTGTIY	243	no	yes	Non-structural protein 9 (nsp9)	KTDSEDTGY	2	no	1	Ole e 11	Olea europaea	Olive	Pectin methylesterase	n/a	no	no	7986.29
HLA-A_01_01	ATEETFKLSY	149	no	yes	Helicase (Hel)	WTEDTFDIAY	1	no	1	Per a 4	Periplaneta americana	American cockroach	Lipocalin	n/a	n/a	n/a	6630.65
HLA-A_02_01	YLYALVYFL	1	no	no	ORF3a	MLYEVLWNL	120	no	1	Asp f 5	Aspergillus fumigatus	Mold	Fungalysin metalloprotease	major	no	no	5974.44
HLA-A_11_01	KTQFNYYKK	1	no	no	Uridylate-specific endoribonuclease (NendoU)	KTIFNYYKK	37	no	1	Fus p 4	Fusarium proliferatum	Bulb rot fungus	Transaldolase	minor	no	no	5399.68
HLA-A_11_01	STFNVPMEK	5	no	yes	Papain-like proteinase	KLFNGPMAK	2	no	1	Tyr p 8	Tyrophagus putrescentiae	Mold mite	Glutathione S-transferase	major	no	no	5364.99
HLA-A_11_01	AVKTQFNYYK	1	no	no	Uridylate-specific endoribonuclease (NendoU)	SVVDIFNYYK	1	no	1	Cla c 14	Cladosporium cladosporioides	Mold	Transaldolase	minor	no	no	5239.67
HLA-A_01_01	VTPSGTWLTY	114	no	yes	Nucleoprotein	ESDPSKWLTY	34	no	1	Asp f 22	Aspergillus fumigatus	Common mold	Enolase	minor	no	no	4526.42
HLA-B_40_02	YELQTPFEI	3	no	yes	Non-structural protein 2 (nsp2)	REYKSDVEL	2	no	1	Der f 14	Dermatophagoides farinae	American house dust mite	Lipoprotein	major	no	no	4033.99
HLA-A_24_02	TYKPNTWCI	2	no	no	Papain-like proteinase	RYQPMSYKL	19	no	1	Per a 11	Periplaneta americana	American cockroach	Alpha-amylase	major	no	no	3970.38
HLA-B_40_02	YENAFLPFA	18	no	yes	Non-structural protein 6 (nsp6)	YENEFLFNL	1	no	1	Der p 14	Dermatophagoides pteronyssinus	European house dust mite	Lipoprotein	n/a	no	no	3854.74
HLA-A_01_01	VTPSGTWLTY	114	no	yes	Nucleoprotein	DSDPTKWLTY	11	no	1	Pen c 22	Penicillium citrinum	Penicillin	Enolase	minor	no	no	3803.95
HLA-A_11_01	TTIKPVTYK	4	no	yes	Papain-like proteinase	SQADVVTYK	15	no	1	Pen c 24	Penicillium citrinum	Penicillin/mold	Eukaryotic elongation factor 1	n/a	no	no	3800.78
HLA-A_02_01	YLNTLTLAV	150	no	yes	2'-O-methyltransferase (2'-O-MT)	YLNTELHVV	5	no	1	Sal k 1	Salsola kali	Prickly saltwort	Pectin methylesterase	major	yes	no	3529.75
HLA-A_11_01	KSAGFPFNK	461	no	yes	RNA-directed RNA polymerase (RdRp)	KSASFPEFK	3	no	1	Art v 4	Artemisia vulgaris	Mugwort	Profilin	minor	no	no	3490.77
HLA-A_11_01	VTNNTFTLK	15	no	no	Non-structural protein 2 (nsp2)	GSNTFTILK	3	no	1	Mus m 1	Mus musculus	Mouse	Lipocalin	major	yes	yes	3285.86
HLA-A_24_02	LYLYALVYF	1	no	no	ORF3a	MYIAGYKTF	1	no	1	Cry j 1	Cryptomeria japonica	Japanese cedar	Pectate lyase	major	yes	no	2831.31
HLA-A_11_01	GVAMPNLYK	150	no	yes	2'-O-methyltransferase (2'-O-MT)	VIAPARLFK	14	no	2	Que a 1	Quercus alba	White oak	Bet v 1 family	major	no	no	2772.21
										Bet v 1	Betula verrucosa	European white birch	Bet v 1 family	major	yes	yes
HLA-A_24_02	LYQPPQTSI	248	no	yes	Non-structural protein 4 (nsp4)	LYQPVSYRI	2	no	1	Blo t 4	Blomia tropicalis	Storage mite	Alpha-amylase	minor	no	no	2648.85
HLA-A_11_01	EVVGDIILK	6	no	yes	Papain-like proteinase	SIFGDIFLK	93	no	1	Asp f 10	Aspergillus fumigatus	Mold	Eukaryotic aspartyl protease	minor	no	no	2555.2
HLA-A_11_01	ATSRTLSYYK	113	no	yes	Membrane protein	SGVSPVSYQK	5	no	1	Aln g 1	Cajanus cajan	European alder	Bet v 1 family	major	yes	yes	2413.14
HLA-A_02_01	FLGRYMSAL	247	no	yes	Papain-like proteinase	FLNTELHAV	2	no	1	Ole e 11	Olea europaea	Olive	Pectin methylesterase	n/a	no	no	2328.44
HLA-A_01_01	ATVAYFNMVY	244	no	yes	Non-structural protein 6 (nsp6)	STADTYNLQY	4	no	1	Bla g 11	Blattella germanica	German cockroach	Alpha-amylase	n/a	no	no	2238.58
HLA-B_07_02	VPGLPGTIL	14	no	yes	Non-structural protein 4 (nsp4)	VPRTTPTSL	6	no	1	Asp n 18	Aspergillus niger	Black mold	n/a	n/a	no	no	2184.66
HLA-A_01_01	VVDKYFDCY	239	no	yes	RNA-directed RNA polymerase (RdRp)	MLDSVVEKY	12	no	1	Cry j 2	Cryptomeria japonica	Japanese cedar	Polygalacturonase	major	no	no	2068.32
HLA-A_01_01	CTDDNALAYY	247	no	yes	Non-structural protein 9 (nsp9)	SSCEVALSYY	1	no	1	Phl p 4	Phleum pratense	Timothy grass	Berberine bridge enzyme	major	yes	no	2000.74
HLA-A_24_02	KHIDAYKTF	117	no	yes	Nucleoprotein	MYIAGYKTF	1	no	1	Cry j 1	Cryptomeria japonica	Japanese cedar	Pectate lyase	major	yes	no	1957.52
HLA-A_24_02	MFDAYVNTF	2	no	no	Papain-like proteinase	KYKTFVATF	8	no	2	Phl p 5	Phleum pratense	Timothy	Group 5/6 grass pollen allergen	major	yes	yes	1910.08
										Poa p 5	Poa pratensis	Kentucky blue grass	Group 5/6 grass pollen allergen	major	no	no
HLA-A_01_01	TVAYFNMVY	244	no	yes	Non-structural protein 6 (nsp6)	TADTYNLQY	4	no		Bla g 11	Blattella germanica	German cockroach	Alpha-amylase	n/a	no	no	1831.4
Supplementary Table S5. The Top 30 candidate human HLA class I potentially cross-reactive T cell epitope pairs between SARS-CoV-2 and food allergens based on pair combined score (pipeline 1). N/a= not available
HLA Allele	Viral protein epitope	How often does it appear in Uniprot?	IEDB known epitope?	Conserved? (among other Corona strains)	Viral protein	Allergen epitope	How often does it appear in Uniprot?	IEDB known epitope?	Conserved? (among other allergens in our file)	Allergen name	Allergen species	Common name	Protein family (AllFam)	Major/Minor (>50% test positive, Allergen.org)	in ISAC®112 assay?	in ALEX® assay?	Pair combined score
HLA-A_24_02	VYYTSNPTTF	3	no	yes	Papain-like proteinase	VYETSNFTSF	52	no	1	Sola l 2	Solanum lycopersicum	Tomato	Glycoside hydrolase family 32	n/a	no	no	6427.85
HLA-A_01_01	GTDLEGNFY	124	no	yes	Proteinase 3CL-PRO	YSNKYGNFY	2	no	1	Lup a 1	Lupinus albus	white lupin	Cupin	n/a	no	no	5745.35
HLA-A_01_01	GTDLEGNFY	124	no	yes	Proteinase 3CL-PRO	YSNKFGNFY	2	no	1	Lup an 1	Lupinus angustifolius	Narrow-leaved blue lupin	Cupin	major	no	no	5175.29
HLA-A_02_01	TLMNVLTLV	6	no	yes	Non-structural protein 6 (nsp6)	YLLDLLPAA	4	no	1	Gal d 6	Gallus domesticus	Chicken	Lipoprotein	n/a	no	no	4185.39
HLA-A_01_01	LTGHMLDMY	186	no	yes	RNA-directed RNA polymerase (RdRp)	PSDKLADLY	36	no	1	Thu a 2	Thunnus albacares	Yellowfin tuna	Unclassified	minor	no	no	4180.23
HLA-A_01_01	CTDDNALAY	247	no	yes	Non-structural protein 9 (nsp9)	YTNAPKLYY	1	no	1	Ber e 2	Bertholletia excelsa	Brazil nut	Cupin	minor	no	no	3403.99
HLA-A_01_01	AMDEFIERY	4	no	yes	Uridylate-specific endoribonuclease (NendoU)	YVDSFRGLY	6	no	1	Sch c 1	Schizophyllum commune	Fungus	Glycoside hydrolase family 15	n/a	no	no	3046.72
HLA-B_07_02	VPGLPGTIL	14	no	yes	Non-structural protein 4 (nsp4)	APHGGGSIL	5	no	1	Cor a 1	Corylus avellana	European hazel	Bet v 1 family	major	yes	yes	2570.72
HLA-A_11_01	TTTIKPVTYK	4	no	yes	Papain-like proteinase	TTISPTRLFK	5	no	1	Sola l 4	Solanum lycopersicum	Tomato	Bet v 1 family	major	no	no	2481.41
HLA-B_07_02	SPYNSQNAV	602	no	yes	Helicase (Hel)	SPLAGRTSV	16	no	1	Ana o 2	Anacardium occidentale	Cashew	Cupin	major	yes	no	2390.25
HLA-A_01_01	FVSLAIDAY	1109	no	yes	RNA-directed RNA polymerase (RdRp)	FADLTNDEY	125	no	1	Act d 1	Actinidia deliciosa	Green kiwi fruit	Papain-like cysteine protease	major	yes	yes	2387.44
HLA-A_11_01	VQIGEYTFEK	151	no	yes	Helicase (Hel)	ASFGPHEFFK	4	no	1	Cuc m 1	Cucumis melo	Muskmelon	Subtilisin-like serine protease	n/a	no	no	2334.41
HLA-B_07_02	RPPLNRNYV	589	no	yes	Helicase (Hel)	RPAYRRYLL	4	no	1	Gal d 6	Gallus domesticus	Chicken	Lipoprotein	n/a	no	no	2273.88
HLA-A_24_02	AYILFTRFF	4	no	yes	Papain-like proteinase	AYTLFSPLF	7	no	1	Pen m 2	Penaeus monodon	Black tiger shrimp	ATP:guanido phosphotransferase	minor	no	no	2213.15
HLA-A_11_01	TSRTLSYYK	114	no	yes	Membrane protein	GSMRGSMYK	2	no	1	Hor v 15	Hordeum vulgare	Barley	Prolamin superfamily	major	no	no	2120.3
HLA-A_02_01	TLMNVLTLV	6	no	yes	Non-structural protein 6 (nsp6)	ALMRYVPGV	2	no	1	Gal d 6	Gallus domesticus	Chicken	Lipoprotein	n/a	no	no	2051.37
HLA-A_11_01	KVFRSSVLH	1	no	no	Surface glycoprotein (S)	KVFRFSMFK	24	no	1	Gal d 6	Gallus domesticus	Chicken	Lipoprotein	n/a	no	no	1884.71
HLA-A_01_01	FVSLAIDAY	1109	no	yes	RNA-directed RNA polymerase (RdRp)	FADLTNEEY	404	no	1	Act d 1	Actinidia deliciosa	Green kiwi fruit	Papain-like cysteine protease	major	yes	yes	1859.64
HLA-A_01_01	VSIINNTVY	2	no	yes	Uridylate-specific endoribonuclease (NendoU)	FADLTNEEY	404	no	1	Act d 1	Actinidia deliciosa	Green kiwi fruit	Papain-like cysteine protease	major	yes	yes	1454.55
HLA-A_01_01	STECSNLLL	4	no	yes	Surface glycoprotein (S)	SSELINCLY	1	no	1	Ani s 7	Anisakis simplex	Herring worm	Unclassified	n/a	no	no	1449.75
HLA-A_02_01	TMADLVYAL	185	no	yes	RNA-directed RNA polymerase (RdRp)	FLGHFIYSV	14	no	1	Gal d 5	Gallus gallus	Chicken (Red junglefowl)	Serum albumin	major	yes	yes	1407.72
HLA-A_11_01	NSASFSTFK	1	no	no	Surface glycoprotein (S)	QSASFPAFK	6	no	1	Mal d 4	Malus domestica	Apple	Profilin	n/a	no	no	1350.47
HLA-A_11_01	NSASFSTFK	1	no	no	Surface glycoprotein (S)	QSATFPAFK	19	no	1	Mal d 4	Malus domestica	Apple	Profilin	n/a	no	no	1200.05
HLA-A_01_01	VPTDNYITTY	3	no	yes	Papain-like proteinase	MTDNEFVAQY	1	no	1	Ana c 2	Ananas comosus	Pineapple	Papain-like cysteine protease	minor	no	yes	1194.57
HLA-A_11_01	LVASIKNFK	190	no	yes	RNA-directed RNA polymerase (RdRp)	KVFRFSMFK	24	no	1	Gal d 6	Gallus domesticus	Chicken	Lipoprotein	n/a	no	no	1194.14
HLA-B_40_02	SEFDRDAAM	234	no	yes	Non-structural protein 8 (nsp8)	KEFQQAQHL	57	no	1	Sin a 1	Sinapis alba	Yellow mustard	Prolamin superfamily	major	no	yes	1136.82
HLA-A_02_01	LLMPILTLT	173	no	yes	RNA-directed RNA polymerase (RdRp)	YLLDLLPAA	4	no	1	Gal d 6	Gallus domesticus	Chicken	Lipoprotein	n/a	no	no	1133.26
HLA-B_07_02	LPSYAAFAT	2	no	no	Non-structural protein 8 (nsp8)	RPAYRRYLL	4	no	1	Gal d 6	Gallus domesticus	Chicken	Lipoprotein	n/a	no	no	1122.41
HLA-A_11_01	TVIEVQGYK	5	no	yes	Papain-like proteinase	TTYAIQENK	28	no	1	Gal d 6	Gallus domesticus	Chicken	Lipoprotein	n/a	no	no	1036.71
HLA-A_02_01	FLGRYMSAL	247	no	yes	Papain-like proteinase	ALMRYVPGV	2	no	1	Gal d 6	Gallus domesticus	Chicken	Lipoprotein	n/a	no	no	1035.8

## Sheet: Top30 MHCII
Supplementary Table S6. The Top 30 candidate human HLA class II potentially cross-reactive T cell epitope pairs between SARS-CoV-2 and aeroallergens based on pair combined score (pipeline 1). N/a= not available
HLA Allele	Viral protein epitope	How often does it appear in Uniprot?	Viral protein epitope core sequence	How often does it appear in Uniprot (Core)?	IEDB known epitope?	Core Conserved? (within other Corona strains)	Viral protein	Allergen epitope	How often does it appear in Uniprot?	Allergen epitope core sequence	How often does it appear in Uniprot (Core)?	IEDB known epitope?	Conserved? (within other allergens in our file)	Allergen name	Allergen spezies	Common name	Protein family (AllFam)	Major/Minor (>50% test positive, Allergen.org)	in ISAC®112 assay?	in ALEX® assay?	Pair combined score
HLA-DRB1_01_01	PLIVTALRANSAVKL	243	VTALRANSA	247	no	yes	Non-structural protein 8 (nsp8)	MLLLTALAAGSAVAR	1	LTALAAGSA	72	no	1	Asp f 4	Aspergillus fumigatus	Common mold	Unclassified	major	no	yes	478.872
HLA-DRB1_01_01	PLIVTALRANSAVKL	243	VTALRANSA	247	no	yes	Non-structural protein 8 (nsp8)	LFLLTALTAGSAVAR	13	LTALTAGSA	42	no	1	Asp f 4	Aspergillus fumigatus	Common mold	Unclassified	major	no	yes	393.814
HLA-DRB1_04_01	KELLVYAADPAMHAA	186	VYAADPAMH	214	no	yes	RNA-directed RNA polymerase (RdRp)	AKKLVFVSDPNLKLT	1	FVSDPNLKL	4	no	1	Cand b 2	Candida boidinii	Yeast	Redoxin	n/a	no	no	277.942
HLA-DRB1_01_01	QQESPFVMMSAPPAQ	4	FVMMSAPPA	239	no	yes	Papain-like proteinase	KEGDVFIMPAAHPVA	11	FIMPAAHPV	11	no	1	Ara h 1	Arachis hypogaea	Peanut	Cupin	major	yes	yes	258.116
HLA-DRB1_04_01	ELLVYAADPAMHAAS	187	VYAADPAMH	214	no	yes	RNA-directed RNA polymerase (RdRp)	RLRELFLDASAFAAS	1	LFLDASAFA	5	no	1	Der p 14	Dermatophagoides pteronyssinus	European house dust mite	Lipoprotein	n/a	no	no	152.266
HLA-DRB1_01_01	LIVTALRANSAVKLQ	243	VTALRANSA	247	no	yes	Non-structural protein 8 (nsp8)	LLLTALAAGSAVARV	1	LTALAAGSA	72	no	1	Asp f 4	Aspergillus fumigatus	Common mold	Unclassified	major	no	yes	150.672
HLA-DRB1_01_01	VNKFLALCADSIIIG	5	FLALCADSI	5	no	yes	Non-structural protein 2 (nsp2)	SNNYFRNLGNGVLRG	1	FRNLGNGVL	1	no	1	Blo t 1	Blomia tropicalis	Storage mite	Papain-like cysteine protease	n/a	no	no	121.398
HLA-DRB1_01_01	LIVTALRANSAVKLQ	243	VTALRANSA	247	no	yes	Non-structural protein 8 (nsp8)	FLLTALTAGSAVARM	13	LTALTAGSA	42	no	1	Asp f 4	Aspergillus fumigatus	Common mold	Unclassified	major	no	yes	116.321
HLA-DRB1_04_01	KELLVYAADPAMHAA	186	VYAADPAMH	214	no	yes	RNA-directed RNA polymerase (RdRp)	QSTYVYSLDAKTVLT	3	YVYSLDAKT	3	no	1	Der p 14	Dermatophagoides pteronyssinus	European house dust mite	Lipoprotein	n/a	no	no	114.517
HLA-DRB1_04_01	VNTFSSTFNVPMEKL	2	FSSTFNVPM	4	no	yes	Papain-like proteinase	YNTFVATFGAASNKA	0	FVATFGAAS	12	no	1	Phl p 5	Phleum pratense	Timothy	Group 5/6 grass pollen allergen	major	yes	yes	87.183
HLA-DRB1_04_01	MTYRRLISMMGFKMN	152	YRRLISMMG	155	no	yes	Guanine-N7 methyltransferase (ExoN)	QVYRRLVTAVNDIEK	1201	YRRLVTAVN	2610	no	2	Bla g 9	Blattella germanica	German cockroach	ATP:guanido phosphotransferase	minor	no	no	83.6404
					no							no		Per a 9	Periplaneta americana	American cockroach	ATP:guanido phosphotransferase	major	no	no
HLA-DRB1_01_01	PLIVTALRANSAVKL	243	VTALRANSA	247	no	yes	Non-structural protein 8 (nsp8)	LLLTALAAGSAVARV	1	LTALAAGSA	72	no	1	Asp f 4	Aspergillus fumigatus	Common mold	Unclassified	major	no	yes	76.3544
HLA-DRB1_03_01	WDLLKYDFTEERLKL	1	LKYDFTEER	185	no	yes	RNA-directed RNA polymerase (RdRp)	LDALKYDITAGRPKL	1	LKYDITAGR	1	no	1	Bet v 8	Betula verrucosa	European whtie birch	Glutathione-S-transferase	minor	no	no	75.1894
HLA-DRB1_04_01	LSHFVNLDNLRANNT	229	FVNLDNLRA	236	no	yes	Papain-like proteinase	AHDYIAVSTLNATNQ	3	YIAVSTLNA	4	no	1	Per a 2	Periplaneta americana	American cockroach	Eukaryotic aspartyl protease	major	no	no	67.945
HLA-DRB1_04_01	LLVYAADPAMHAASG	187	YAADPAMHA	187	no	yes	RNA-directed RNA polymerase (RdRp)	LRELFLDASAFAASD	1	LFLDASAFA	5	no	1	Der p 14	Dermatophagoides pteronyssinus	European house dust mite	Lipoprotein	n/a	no	no	61.8023
HLA-DRB1_04_01	SLSHFVNLDNLRANN	5	FVNLDNLRA	236	no	yes	Papain-like proteinase	EAHDYIAVSTLNATN	3	YIAVSTLNA	4	no	1	Per a 2	Periplaneta americana	American cockroach	Eukaryotic aspartyl protease	major	no	no	54.7663
HLA-DRB1_03_01	VLALLSDLQDLKWAR	2	LLSDLQDLK	5	no	yes	Non-structural protein 9 (nsp9)	DALVMIDSHDLRVGH	13	VMIDSHDLR	13	no	1	Der p 4	Dermatophagoides pteronyssinus	European house dust mite	Alpha-amylase	minor	no	no	53.4855
HLA-DRB1_04_01	DAYVNTFSSTFNVPM	2	FSSTFNVPM	4	no	yes	Papain-like proteinase	KTFVATFGAASNKAF	7	FVATFGAAS	12	no	1	Phl p 5	Phleum pratense	Timothy	Group 5/6 grass pollen allergen	major	yes	yes	52.78
HLA-DRB1_04_01	DAYVNTFSSTFNVPM	2	FSSTFNVPM	4	no	yes	Papain-like proteinase	RTFVATFGAASNKAF	5	FVATFGAAS	12	no	1	Phl p 5	Phleum pratense	Timothy	Group 5/6 grass pollen allergen	major	yes	yes	49.4224
HLA-DRB1_03_01	LALLSDLQDLKWARF	2	LLSDLQDLK	5	no	yes	Non-structural protein 9 (nsp9)	ALVMIDSHDLRVGHT	13	VMIDSHDLR	13	no	1	Der p 4	Dermatophagoides pteronyssinus	European house dust mite	Lipoprotein	n/a	no	no	43.331
HLA-DRB1_04_01	DAYVNTFSSTFNVPM	2	FSSTFNVPM	4	no	yes	Papain-like proteinase	NTFVATFGAASNKAF	0	FVATFGAAS	12	no	1	Phl p 5	Phleum pratense	Timothy	Group 5/6 grass pollen allergen	major	yes	yes	41.575
HLA-DRB1_04_01	DAYVNTFSSTFNVPM	2	FSSTFNVPM	4	no	yes	Papain-like proteinase	KTFVATFGTASNKAF	1	FVATFGTAS	1	no	1	Poa p 9	Poa pratensis	Kentucky blue grass	Pollen allergen KBG 41	n/a	no	no	41.0907
HLA-DRB1_04_01	DAYVNTFSSTFNVPM	2	FSSTFNVPM	4	no	yes	Papain-like proteinase	DAAFKVAATAANAAP	11	FKVAATAAN	15	no	1	Phl p 5	Phleum pratense	Timothy	Group 5/6 grass pollen allergen	major	yes	yes	37.537
HLA-DRB1_04_01	ASEFSSLPSYAAFAT	2	FSSLPSYAA	246	no	yes	Non-structural protein 8 (nsp8)	VLRIINEPTAAAIAY	6492	IINEPTAAA	39995	no	1	Der f 28	Dermatophagoides farinae	American house dust mite	Heat shock protein P70	major	no	no	37.2125
HLA-DRB1_04_01	LSHFVNLDNLRANNT	229	FVNLDNLRA	236	no	yes	Papain-like proteinase	MENFVNQDNIANSFS	3	FVNQDNIAN	3	no	1	Per a 2	Periplaneta americana	American cockroach	Eukaryotic aspartyl protease	major	no	no	33.6218
HLA-DRB1_03_01	DLLKYDFTEERLKLF	1	LKYDFTEER	185	no	yes	RNA-directed RNA polymerase (RdRp)	DALKYDITAGRPKLA	1	LKYDITAGR	1	no	1	Bet v 8	Betula verrucosa	European whtie birch	Glutathione-S-transferase	minor	no	no	32.4347
HLA-DRB1_04_01	FKELLVYAADPAMHA	185	VYAADPAMH	214	no	yes	RNA-directed RNA polymerase (RdRp)	DAKKLVFVSDPNLKL	1	FVSDPNLKL	4	no	1	Cand b 2	Candida boidinii	Yeast	Redoxin	n/a	no	no	30.7327
HLA-DRB1_04_01	DAYVNTFSSTFNVPM	2	FSSTFNVPM	4	no	yes	Papain-like proteinase	RTFVATFGPASNKAF	1	FVATFGPAS	1	no	1	Phl p 5	Phleum pratense	Timothy	Group 5/6 grass pollen allergen	major	yes	yes	28.6154
HLA-DRB1_03_01	LTFYLTNDVSFLAHI	4	LTNDVSFLA	4	no	yes	Non-structural protein 4 (nsp4)	IDFFTSNTRARFEEV	1	FTSNTRARF	1	no	1	Cla h 4	Cladosporium herbarum	Mold	Heat shock protein Hsp70	n/a	no	no	27.1036
HLA-DRB1_03_01	VLALLSDLQDLKWAR	2	LLSDLQDLK	5	no	yes	Non-structural protein 9 (nsp9)	DALIMVDSHDLQRGH	1	IMVDSHDLQ	1	no	1	Blo t 4	Blomia tropicalis	Storage mite	Alpha-amylase	minor	no	no	24.1389
Supplementary Table S7. The Top 30 candidate human HLA class II potentially cross-reactive T cell epitope pairs between SARS-CoV-2 and food allergens based on pair combined score (pipeline 1). N/a= not available
HLA Allele	Viral protein epitope	How often does it appear in Uniprot?	Viral protein epitope core sequence	How often does it appear in Uniprot?	IEDB known epitope?	Core Conserved? (within other Corona strains)	Viral protein	Allergen epitope	How often does it appear in Uniprot?	Allergen epitope core sequence	How often does it appear in Uniprot?	IEDB known epitope?	Conserved? (within other allergens in our file)	Allergen name	Allergen spezies	Common name	Protein family (AllFam)	Major/Minor (>50% test positive, Allergen.org)	in ISAC®112 assay?	in ALEX® assay?	Pair combined score
HLA-DRB1_01_01	ESPFVMMSAPPAQYE	4	FVMMSAPPA	239	no	yes	Papain-like proteinase	VETFVMMEGGAQNGK	2	FVMMEGGAQ	2	no	1	Cof a 3	Coffea arabica	Arabian coffee	Unclassified	minor	no	no	656.66
HLA-DRB1_04_01	DMTYRRLISMMGFKM	152	YRRLISMMG	155	no	yes	Guanine-N7 methyltransferase (ExoN)	ASTYRAMISAPQGLT	4	YRAMISAPQ	4	no	1	Cuc m 1	Cucumis melo	Muskmelon	Subtilisin-like serine protease	n/a	no	no	541.869
HLA-DRB1_04_01	AWWTAFVTNVNASSS	4	FVTNVNASS	150	no	yes	2'-O-methyltransferase (2'-O-MT)	FEWISFKTNANAMIS	10	WISFKTNAN	23	no	1	Sin a 2	Sinapis alba	Yellow mustard	Cupin	minor	no	no	457.892
HLA-DRB1_01_01	SPFVMMSAPPAQYEL	4	FVMMSAPPA	239	no	yes	Papain-like proteinase	ETFVMMEGGAQNGKC	2	FVMMEGGAQ	2	no	1	Cof a 3	Coffea arabica	Arabian coffee	Unclassified	minor	no	no	320.614
HLA-DRB1_01_01	KSAFYILPSIISNEK	2	FYILPSIIS	3	no	yes	Papain-like proteinase	RHPFLYAPAILSFAV	2	FLYAPAILS	4	no	1	Gal d 5	Gallus domesticus	Chicken	Serum albumin	major	yes	yes	299.049
HLA-DRB1_01_01	QQESPFVMMSAPPAQ	4	FVMMSAPPA	239	no	yes	Papain-like proteinase	KEGDVFIMPAAHPVA	11	FIMPAAHPV	11	no	1	Ara h 1	Arachis hypogaea	Peanut	Cupin	major	yes	yes	258.116
HLA-DRB1_04_01	KDMTYRRLISMMGFK	151	YRRLISMMG	155	no	yes	Guanine-N7 methyltransferase (ExoN)	QASTYRAMISAPQGL	4	YRAMISAPQ	4	no	1	Cuc m 1	Cucumis melo	Muskmelon	Subtilisin-like serine protease	n/a	no	no	239.472
HLA-DRB1_04_01	AYVNTFSSTFNVPME	2	FSSTFNVPM	4	no	yes	Papain-like proteinase	LLLALFSSAHAANFE	2	LLALFSSAH	3	no	1	Act d 2	Actinidia deliciosa	Green Kiwi fruit	Thaumatin-like protein	major	yes	yes	221.473
HLA-DRB1_01_01	PKYKFVRIQPGQTFS	247	FVRIQPGQT	247	no	yes	Proteinase 3CL-PRO	PILEFIQLSAQHVVL	12	FIQLSAQHV	12	no	1	Fag e 1	Fagopyrum esculentum	Common buckwheat	Cupin	n/a	no	no	210.359
HLA-DRB1_04_01	DMTYRRLISMMGFKM	152	YRRLISMMG	155	no	yes	Guanine-N7 methyltransferase (ExoN)	IPSIRRLISSLQTGI	2	IRRLISSLQ	7	no	1	Gal d 6	Gallus domesticus	Chicken	Lipoprotein	n/a	no	no	197.173
HLA-DRB1_01_01	PKYKFVRIQPGQTFS	247	FVRIQPGQT	247	no	yes	Proteinase 3CL-PRO	PILEFLQLSAQHVVL	7	FLQLSAQHV	8	no	2	Fag t 1	Fagopyrum tataricum	Tartarian buckwheat	Cupin	n/a	no	no	167.838
												no		Fag e 1	Fagopyrum esculentum	Common buckwheat	Cupin	n/a	no	no
HLA-DRB1_04_01	IASEFSSLPSYAAFA	2	FSSLPSYAA	246	no	yes	Non-structural protein 8 (nsp8)	LAAKYFVLNNAGSLI	2	YFVLNNAGS	2	no	1	Gal d 6	Gallus domesticus	Chicken	Lipoprotein	n/a	no	no	151.125
HLA-DRB1_04_01	WTAFVTNVNASSSEA	150	FVTNVNASS	150	no	yes	2'-O-methyltransferase (2'-O-MT)	WISFKTNDNAMTSQL	1	FKTNDNAMT	20	no	1	Ses i 7	Sesamum indicum	Sesame	Cupin	minor	no	no	125.974
HLA-DRB1_04_01	KGKYVQIPTTCANDP	239	YVQIPTTCA	239	no	yes	Non-structural protein 10 (nsp10)	LGQVFRRLTSAVNEI	14	FRRLTSAVN	14	no	3	Pen m 2	Penaeus monodon	Black tiger shrimp	ATP:guanido phosphotransferase	minor	yes	no	120.663
												no		Lit v 2	Litopenaeus vannamei	Whiteleg shrimp	ATP:guanido phosphotransferase	major	no	no
												no		Cra c 2	Crangon crangon	Brown shrimp	ATP:guanido phosphotransferase	minor	no	no
HLA-DRB1_03_01	EFACVVADAVIKTLQ	5	VVADAVIKT	5	no	yes	Papain-like proteinase	PILMILVDAVLKEPS	2	ILVDAVLKE	2	no	1	Gal d 6	Gallus domesticus	Chicken	Lipoprotein	n/a	no	no	115.921
HLA-DRB1_03_01	FACVVADAVIKTLQP	5	VVADAVIKT	5	no	yes	Papain-like proteinase	ILMILVDAVLKEPSM	2	ILVDAVLKE	2	no	1	Gal d 6	Gallus domesticus	Chicken	Lipoprotein	n/a	no	no	112.577
HLA-DRB1_01_01	DMTYRRLISMMGFKM	152	YRRLISMMG	155	no	yes	Guanine-N7 methyltransferase (ExoN)	ASTYRAMISAPQGLT	4	YRAMISAPQ	4	no	1	Cuc m 1	Cucumis melo	Muskmelon	Subtilisin-like serine protease	n/a	no	no	95.6239
HLA-DRB1_04_01	KDMTYRRLISMMGFK	151	YRRLISMMG	155	no	yes	Guanine-N7 methyltransferase (ExoN)	KIPSIRRLISSLQTG	2	IRRLISSLQ	7	no	1	Gal d 6	Gallus domesticus	Chicken	Lipoprotein	n/a	no	no	95.4537
HLA-DRB1_01_01	ASEFSSLPSYAAFAT	2	FSSLPSYAA	246	no	yes	Non-structural protein 8 (nsp8)	KHIKKFLPGYAAGAS	22	FLPGYAAGA	23	no	1	Gal d 6	Gallus domesticus	Chicken	Lipoprotein	n/a	no	no	94.4393
HLA-DRB1_04_01	MTYRRLISMMGFKMN	152	YRRLISMMG	155	no	yes	Guanine-N7 methyltransferase (ExoN)	QVYRRLVSAVNEIEK	171	YRRLVSAVN	502	no	2	Scy p 2	Scylla paramamosain	green mud crab	ATP:guanido phosphotransferase	major	no	no	93.3409
												no		Pro c 2	Procambarus clarkii	Red Swamp Crayfish	ATP:guanido phosphotransferase	major	no	no
HLA-DRB1_04_01	MTYRRLISMMGFKMN	152	YRRLISMMG	155	no	yes	Guanine-N7 methyltransferase (ExoN)	PSIRRLISSLQTGIG	2	IRRLISSLQ	7	no	1	Gal d 6	Gallus domesticus	Chicken	Lipoprotein	n/a	no	no	86.4235
HLA-DRB1_01_01	LFFFLYENAFLPFAM	2	FLYENAFLP	2	no	no	Non-structural protein 6 (nsp6)	RHPFLYAPAILSFAV	2	FLYAPAILS	4	no	1	Gal d 5	Gallus domesticus	Chicken	Serum albumin	major	yes	yes	80.6385
HLA-DRB1_01_01	PFVMMSAPPAQYELK	4	FVMMSAPPA	239	no	yes	Papain-like proteinase	TFVMMEGGAQNGKCK	2	FVMMEGGAQ	2	no	1	Cof a 3	Coffea arabica	Arabian coffee	Unclassified	minor	no	no	79.4404
HLA-DRB1_01_01	TPKYKFVRIQPGQTF	247	YKFVRIQPG	247	no	yes	Proteinase 3CL-PRO	LPILEFIQLSAQHVV	12	FIQLSAQHV	12	no	1	Fag e 1	Fagopyrum esculentum	Common buckwheat	Cupin	n/a	no	no	78.1051
HLA-DRB1_01_01	TPKYKFVRIQPGQTF	247	YKFVRIQPG	247	no	yes	Proteinase 3CL-PRO	LPILEFLQLSAQHVV	12	FLQLSAQHV	8	no	2	Fag t 1	Fagopyrum tataricum	Tartarian buckwheat	Cupin	n/a	no	no	63.7359
														Fag e 1	Fagopyrum esculentum	Common buckwheat	Cupin	n/a	no	no
HLA-DRB1_03_01	NEFACVVADAVIKTL	5	VVADAVIKT	5	no	yes	Papain-like proteinase	LPILMILVDAVLKEP	2	ILVDAVLKE	2	no	1	Gal d 6	Gallus domesticus	Chicken	Lipoprotein	n/a	no	no	44.0525
HLA-DRB1_03_01	SVGFNIDYDCVSFCY	244	IDYDCVSFC	244	no	yes	Proteinase 3CL-PRO	AQSFNIDTQLARRLQ	1	FNIDTQLAR	1	no	1	Pis v 2	Pistacia vera	Pistachio	Cupin	n/a	no	no	37.3372
HLA-DRB1_03_01	FACVVADAVIKTLQP	5	VVADAVIKT	5	no	yes	Papain-like proteinase	FKPVYSDVPIEKIQV	3	VYSDVPIEK	3	no	1	Gal d 6	Gallus domesticus	Chicken	Lipoprotein	n/a	no	no	28.9306
HLA-DRB1_03_01	EFACVVADAVIKTLQ	5	VVADAVIKT	5	no	yes	Papain-like proteinase	SFKPVYSDVPIEKIQ	3	VYSDVPIEK	3	no	1	Gal d 6	Gallus domesticus	Chicken	Lipoprotein	n/a	no	no	24.6201
